# Supplementary material for: Bcl-xL activity influences outcome of the mitotic arrest
Source: PubMed Central journal article supplement (PMC9520339; doi:10.3389/fphar.2022.933112), 2022-09-15
Supplement: DataSheet1.pdf [file DataSheet1.pdf]

**Supplementary Table 1.** Average durations of mitotic stage (in hours) for HeLa, HaCaT, U-118, PHF, A549, PC-3 and 3T3 cell lines after treatment with 1-1000 nM doses of 3 MT drugs. For each cell line, T1 dose is colored in purple; durations of mitotic arrest in T2 and higher doses are colored in red (brick) for Nocodazole, green for Taxol and blue for Vinorelbine.

|              | Control   | 1 nM      | 3 nM       | 10 nM      | 30 nM      | 100 nM     | 300 nM      | 1000 nM     |
|--------------|-----------|-----------|------------|------------|------------|------------|-------------|-------------|
| <b>HeLa</b>  |           |           |            |            |            |            |             |             |
| Nocodazole   | 0.64±0.22 | 0.76±0.30 | 0.98±0.53  | 1.08±0.74  | 6.09±4.41  | 10.97±4.58 | 14.38±4.77  | 14.34±5.69  |
| Taxol        | 0.64±0.22 | 1.05±0.73 | 12.89±5.00 | 14.84±6.30 | 14.87±6.35 | 13.96±5.13 | 13.74±5.66  | 12.71±6.05  |
| Vinorelbine  | 0.64±0.22 | 0.84±0.41 | 0.76±0.39  | 7.66±6.87  | 13.23±6.55 | 16.90±5.46 | 16.27±7.52  | 16.77±6.16  |
| <b>HaCaT</b> |           |           |            |            |            |            |             |             |
| Nocodazole   | 0.89±0.23 | 0.84±0.20 | 0.89±0.26  | 0.83±0.20  | 1,10±0.53  | 7.44±2.59  | 8.63±4.84   | 8.78±4.39   |
| Taxol        | 0.89±0.23 | 1.15±0.50 | 1.50±0.43  | 4.46±1.94  | 7.49±3.03  | 7.44±3.62  | 8.72±3.95   | 10.37±5.33  |
| Vinorelbine  | 0.89±0.23 | 1.18±0.50 | 1.21±0.47  | 5.23±1.81  | 7.36±2.49  | 8.82±4.10  | 9.19±5.16   | 11.72±6.36  |
| <b>U-118</b> |           |           |            |            |            |            |             |             |
| Nocodazole   | 1.22±0.40 | 1.18±0.46 | 1,30±0.44  | 1.58±0.65  | 3.20±2.30  | 12.12±6.50 | 12.15±5.14  | 15.36±7.17  |
| Taxol        | 1.22±0.40 | 1.78±0.95 | 2.77±1.07  | 7.23±3.73  | 12.06±5.22 | 14.57±7.08 | 15.44±6.10  | 14.03±5.51  |
| Vinorelbine  | 1.22±0.40 | 0.90±0.31 | 1.07±0.48  | 14.96±4.79 | 15.85±8.97 | 15.81±6.66 | 15.48±7.28  | 14.74±5.47  |
| <b>PHF</b>   |           |           |            |            |            |            |             |             |
| Nocodazole   | 1.01±0.41 | 0.98±0.24 | 0.92±0.19  | 0.97±0.23  | 1.02±0.42  | 12.82±5.26 | 21.06±13.01 | 24.43±11.43 |
| Taxol        | 1.01±0.39 | 0.93±0.22 | 3.08±1.17  | 4.61±1.6   | 6.55±4.01  | 10.03±6.36 | 15.41±6.95  | 16.28±6.77  |
| Vinorelbine  | 1.01±0.39 | 0.87±0.19 | 0.89±0.15  | 0.97±0.18  | 0.97±0.36  | 3.48±2.17  | 13.65±6.27  | 25.45±15.37 |
| <b>A549</b>  |           |           |            |            |            |            |             |             |
| Nocodazole   | 0.83±0.25 | 0,90±0.31 | 0.95±0.28  | 0.99±0.26  | 3.35±1.89  | 15.40±4.85 | 18.48±6.61  | 20.46±6.72  |
| Taxol        | 0.83±0.25 | 0.88±0.30 | 0.73±0.26  | 3.28±1.60  | 15.27±5.25 | 15.72±4.66 | 18.41±5.31  | 19.56±4.94  |
| Vinorelbine  | 0.83±0.25 | 0.84±0.36 | 0.73±0.31  | 6.07±5.42  | 20.15±7.19 | 21.7±9.48  | 22.15±7.83  | 21.83±6.56  |
| <b>PC-3</b>  |           |           |            |            |            |            |             |             |
| Nocodazole   | 1.05±0.27 | 0.86±0.23 | 0.88±0.21  | 0.87±0.23  | 8.10±5.79  | 17.83±4.95 | 19.39±5.45  | 20.69±6.2   |
| Taxol        | 1.05±0.27 | 0.88±0.23 | 0.93±0.29  | 7.85±3.87  | 15.69±6.31 | 17.97±6.27 | 20.11±5.84  | 19.49±7.57  |
| Vinorelbine  | 1.05±0.27 | 0.73±0.28 | 0.76±0.24  | 1.04±0.62  | 17.12±4.93 | 20,00±5.40 | 19.33±5.73  | 20.37±7.12  |
| <b>3T3</b>   |           |           |            |            |            |            |             |             |
| Nocodazole   | 0.98±0.37 | 0.88±0.30 | 0,90±0.25  | 0.97±0.28  | 0.96±0.28  | 3.20±1.05  | 8.77±2.74   | 7.06±2.62   |
| Taxol        | 0.98±0.37 | 0.88±0.30 | 0.90±0.25  | 0.97±0.28  | 0.96±0.28  | 0.88±0.30  | 2.94±2.03   | 5.95±2.25   |
| Vinorelbine  | 0.98±0.37 | 0.97±0.28 | 0.78±0.25  | 0.88±0.30  | 0.90±0.25  | 7.75±3.47  | 7.75±2.65   | 8.39±3.41   |

**Supplementary Table 2.** Average duration of mitotic arrest (in hours) in post-T2 doses of Nocodazole, Taxol and Vinorelbine for HeLa, HaCaT, U-118, PHF, A549, PC-3 and 3T3 cell lines. N= >100 cells for each treatment group.

|              | Nocodazole | Taxol       | Vinorelbine |
|--------------|------------|-------------|-------------|
| <b>HeLa</b>  | 13.23±5.25 | 13.82±5.82  | 15.79±6.59  |
| <b>HaCaT</b> | 8.28±4.08  | 8.48±4.19   | 9.27±4.97   |
| <b>U-118</b> | 13.21±6.47 | 14.02±6.1   | 15.26±6.71  |
| <b>PHF</b>   | 22.75±12.3 | 15.85±6.845 | 19.55±13.1  |
| <b>A549</b>  | 18.11±6.43 | 16.94±5.22  | 21.45±7.82  |
| <b>PC-3</b>  | 17.39±7.25 | 16.99±7.49  | 19.37±6.08  |
| <b>3T3</b>   | 7.91±2.8   | 5.95±2.35   | 7.96±3.19   |

**Supplementary Table 3.** Comparison of durations of mitotic arrest within the same cell line after treatment with post-T2 doses of Nocodazole (N), Taxol (T) or Vinorelbine (V). Results obtained by ANOVA analysis.

|                            | Significant? | p-value |
|----------------------------|--------------|---------|
| <b>N HeLa vs. T HeLa</b>   | No           | 0.6302  |
| <b>N HeLa vs. V HeLa</b>   | Yes          | 0.0002  |
| <b>T HeLa vs. V HeLa</b>   | Yes          | 0.003   |
| <b>N HaCaT vs. T HaCaT</b> | No           | 0.9159  |
| <b>N HaCaT vs. V HaCaT</b> | No           | 0.1011  |
| <b>T HaCaT vs. V HaCaT</b> | No           | 0.1784  |
| <b>N U-118 vs. T U-118</b> | No           | 0.474   |
| <b>N U-118 vs. V U-118</b> | Yes          | 0.0061  |
| <b>T U-118 vs. V U-118</b> | No           | 0.107   |
| <b>N PHF vs. T PHF</b>     | Yes          | <0.0001 |
| <b>N PHF vs. V PHF</b>     | No           | 0.1051  |
| <b>T PHF vs. V PHF</b>     | Yes          | 0.0489  |
| <b>N A549 vs. T A549</b>   | No           | 0.1863  |
| <b>N A549 vs. V A549</b>   | Yes          | <0.0001 |
| <b>T A549 vs. V A549</b>   | Yes          | <0.0001 |
| <b>N PC-3 vs. T PC-3</b>   | No           | 0.8565  |
| <b>N PC-3 vs. V PC-3</b>   | Yes          | 0.0303  |
| <b>T PC-3 vs. V PC-3</b>   | Yes          | 0.0044  |
| <b>N 3T3 vs. T 3T3</b>     | Yes          | <0.0001 |
| <b>N 3T3 vs. V 3T3</b>     | No           | 0.9908  |
| <b>T 3T3 vs. V 3T3</b>     | Yes          | <0.0001 |

**Supplementary Table 4.** Results from ANOVA analysis. Comparison of durations of mitotic arrest between different cell lines after treatment with post-T2 doses of Nocodazole, Taxol or Vinorelbine.

|                        | Nocodazole   |         | Taxol        |         | Vinorelbine  |         |
|------------------------|--------------|---------|--------------|---------|--------------|---------|
|                        | Significant? | p-value | Significant? | p-value | Significant? | p-value |
| <b>HeLa vs. HaCaT</b>  | Yes          | <0.0001 | Yes          | <0.0001 | Yes          | <0.0001 |
| <b>HeLa vs. U-118</b>  | No           | >0.9999 | No           | 0.9998  | No           | 0.9853  |
| <b>HeLa vs. A549</b>   | Yes          | <0.0001 | Yes          | <0.0001 | Yes          | <0.0001 |
| <b>HeLa vs. PC-3</b>   | Yes          | <0.0001 | Yes          | <0.0001 | Yes          | <0.0001 |
| <b>HeLa vs. 3T3</b>    | Yes          | <0.0001 | Yes          | <0.0001 | Yes          | <0.0001 |
| <b>HeLa vs. PHF</b>    | Yes          | <0.0001 | No           | 0.0535  | Yes          | 0.0002  |
| <b>HaCaT vs. U-118</b> | Yes          | <0.0001 | Yes          | <0.0001 | Yes          | <0.0001 |
| <b>HaCaT vs. A549</b>  | Yes          | <0.0001 | Yes          | <0.0001 | Yes          | <0.0001 |
| <b>HaCaT vs. PC-3</b>  | Yes          | <0.0001 | Yes          | <0.0001 | Yes          | <0.0001 |
| <b>HaCaT vs. 3T3</b>   | No           | 0.9995  | Yes          | 0.003   | No           | 0.5929  |
| <b>HaCaT vs. PHF</b>   | Yes          | <0.0001 | Yes          | <0.0001 | Yes          | <0.0001 |
| <b>U-118 vs. A549</b>  | Yes          | <0.0001 | Yes          | <0.0001 | Yes          | <0.0001 |
| <b>U-118 vs. PC-3</b>  | Yes          | <0.0001 | Yes          | <0.0001 | Yes          | <0.0001 |
| <b>U-118 vs. 3T3</b>   | Yes          | <0.0001 | Yes          | <0.0001 | Yes          | <0.0001 |
| <b>U-118 vs. PHF</b>   | Yes          | <0.0001 | No           | 0.1167  | Yes          | <0.0001 |
| <b>A549 vs. PC-3</b>   | No           | 0.9646  | No           | >0.9999 | No           | 0.0742  |
| <b>A549 vs. 3T3</b>    | Yes          | <0.0001 | Yes          | <0.0001 | Yes          | <0.0001 |
| <b>A549 vs. PHF</b>    | Yes          | <0.0001 | No           | 0.6723  | No           | 0.2838  |
| <b>PC-3 vs. 3T3</b>    | Yes          | <0.0001 | Yes          | <0.0001 | Yes          | <0.0001 |
| <b>PC-3 vs. PHF</b>    | Yes          | <0.0001 | No           | 0.6666  | No           | >0.9999 |
| <b>3T3 vs. PHF</b>     | Yes          | <0.0001 | Yes          | <0.0001 | Yes          | <0.0001 |

**Supplementary Table 5.** Average durations of mitotic arrest (in hours) for A549,PC-3, HeLa and HaCaT cell lines after treatment with 1 uM Taxol (T) in combination with 10 uM Navitoclax (NVTX), Venetoclax (VNTX), S63845 (S) or A-1155463 (A). N > 30 cells for each treatment group.

|              | T         | T+NVTX    | T+VNTX    | T+S       | T+A-1155  | T+A-1331  |
|--------------|-----------|-----------|-----------|-----------|-----------|-----------|
| <b>A549</b>  | 16.4±4.31 | 7.02±1.56 | 16.8±6.46 | 15.6±5.49 | 10.2±2.41 | 8.4±3.12  |
| <b>PC-3</b>  | 19.5±7.65 | 8.71±4.44 | 18±6.31   | 19.8±5.74 | 11.5±4.48 | 6.79±3.33 |
| <b>PHF</b>   | 16.3±6.78 | 11.2±4.99 | 17.6±7.57 | 15.5±7.08 | 12.8±3.65 | 11.2±3.53 |
| <b>HeLa</b>  | 12.7±6.04 | 7.29±2.72 | 9.1±3.38  | 8.18±3.56 | 8±3.69    | 6.75±3.25 |
| <b>HaCaT</b> | 9.87±5.13 | 5.02±2.62 | 7.45±2.87 | 8.15±2.35 | 3.79±2.75 | 4.33±1.6  |

**Supplementary Table 6.** Statistical significance of the between duration of mitotic arrest between Taxol only and Taxo +Bcl-2 inhibitor treated cells. Results from ANOVA analysis.

|              | T vs. T+NVTX |         | T vs. T+VNTX |         | T vs. T+S63  |         | T vs. T+A-1155 |         | T vs. T+A-1331 |         |
|--------------|--------------|---------|--------------|---------|--------------|---------|----------------|---------|----------------|---------|
|              | Significant? | p-value | Significant? | p-value | Significant? | p-value | Significant?   | p-value | Significant?   | p-value |
| <b>A549</b>  | Yes          | <0.0001 | No           | 0.9875  | No           | 0.8678  | Yes            | <0.0001 | Yes            | <0.0001 |
| <b>PC-3</b>  | Yes          | <0.0001 | No           | 0.517   | No           | 0.9986  | Yes            | <0.0001 | Yes            | <0.0001 |
| <b>PHF</b>   | Yes          | <0.0001 | No           | 0.7019  | No           | 0.9478  | Yes            | 0.0115  | Yes            | <0.0001 |
| <b>HeLa</b>  | Yes          | <0.0001 | Yes          | <0.0001 | Yes          | <0.0001 | Yes            | <0.0001 | Yes            | <0.0001 |
| <b>HaCaT</b> | Yes          | <0.0001 | Yes          | 0.0003  | Yes          | 0.0198  | Yes            | <0.0001 | Yes            | <0.0001 |

**Supplementary Table 7.** Average durations of mitotic arrest (in hours) of slippage prone A549 and PC-3 cell lines after the treatment with 1 uM doses of Nocodazole, Taxol or Vinorelbine in combination with 10-10000 nM doses of A-1155463.

| <b>A-1155463</b> | 0          | 10 nM      | 30 nM      | 100 nM     | 300 nM     | 1000 nM    | 3000 nM    | 10000 nM   |
|------------------|------------|------------|------------|------------|------------|------------|------------|------------|
| <b>A549</b>      |            |            |            |            |            |            |            |            |
| Nocodazole       | 20.43±7.35 | 19.76±6.24 | 15.43±5.75 | 13.04±5.3  | 11.05±3.3  | 10.56±4.11 | 11.1±5.45  | 9.88±3.88  |
| Taxol            | 19.77±4.75 | 14.82±4.91 | 13.36±4.69 | 13.08±3.56 | 10.94±3.32 | 11.25±3.95 | 11.39±2.71 | 9.26±3.53  |
| Vinorelbine      | 22.68±6.62 | 18.79±5.75 | 16.91±5.23 | 14.64±5.22 | 13.01±3.73 | 10.5±4.38  | 10.71±3.53 | 9.39±3.33  |
| <b>PC-3</b>      |            |            |            |            |            |            |            |            |
| Nocodazole       | 20.52±6.14 | 19.34±6.46 | 17.33±5.02 | 16.68±3.81 | 15.54±4.79 | 13.83±5.51 | 14.8±4.82  | 12.8±5.26  |
| Taxol            | 19.51±7.65 | 16.51±5.14 | 15.84±5.11 | 14.57±4.19 | 14.45±5.27 | 16.7±5.35  | 13.44±4.78 | 11.47±4.48 |
| Vinorelbine      | 20.37±7.12 | 17.48±5.91 | 17.14±6.3  | 14.83±4.12 | 14.92±5.91 | 14.9±5.93  | 12.14±4.13 | 10.23±5.21 |

**Supplementary Table 8.** Average durations of mitotic arrest (in hours) of slippage prone A549 and PC-3 cell lines after the treatment with 1 uM doses of Nocodazole, Taxol or Vinorelbine in combination with 10-10000 nM doses of Navitoclax.

| <b>Navitoclax</b> | 0          | 10 nM      | 30 nM      | 100 nm     | 300 nM     | 1000 nM    | 3000 nM    | 10000 nM  |
|-------------------|------------|------------|------------|------------|------------|------------|------------|-----------|
| <b>A549</b>       |            |            |            |            |            |            |            |           |
| Nocodazole        | 23.82±6.79 | 22.01±5.95 | 21.12±6.4  | 20.15±5.36 | 16.35±4.18 | 12.48±3.35 | 10.9±3.8   | 9.15±4.09 |
| Taxol             | 17.4±4.02  | 15.43±4.81 | 15.3±4.79  | 12.67±3.7  | 12.21±3.2  | 9.86±3.02  | 9.98±2.29  | 7.11±1.46 |
| Vinorelbine       | 25.41±8.01 | 27.4±9.51  | 25.96±7.75 | 20.51±5.63 | 17.51±5.92 | 14.98±6.46 | 10.77±5.18 | 9.43±4.84 |
| <b>PC-3</b>       |            |            |            |            |            |            |            |           |
| Nocodazole        | 20.04±5.84 | 19.56±5.35 | 19.56±5.99 | 19.35±6.6  | 17.36±4.97 | 16.8±5.43  | 11.61±5.43 | 7.93±3.5  |
| Taxol             | 19.8±6.74  | 21.56±5.42 | 18.86±4.81 | 19.03±7.48 | 19.25±6.03 | 16.86±6.7  | 12.59±4.87 | 8.71±4.44 |
| Vinorelbine       | 19.86±6.46 | 21.36±5.9  | 20.15±5.93 | 19.79±6.13 | 17.98±6.56 | 15.64±5.53 | 13.58±5.2  | 6.9±3.32  |

**Supplementary Table 9.** Average durations of mitotic arrest (in hours) of slippage prone A549 and PC-3 cell lines after the treatment with 1  $\mu$ M doses of Nocodazole, Taxol or Vinorelbine in combination with 10-10000 nM doses of A-1331852.

| <b>A-1331852</b> | 0                | 10 nM             | 30 nM            | 100 nm           | 300 nM           | 1000 nM          | 3000 nM          | 10000 nM        |
|------------------|------------------|-------------------|------------------|------------------|------------------|------------------|------------------|-----------------|
| <b>A549</b>      |                  |                   |                  |                  |                  |                  |                  |                 |
| Nocodazole       | 24.99 $\pm$ 9.83 | 14.16 $\pm$ 6.602 | 13.16 $\pm$ 4.81 | 11.08 $\pm$ 4.34 | 10.03 $\pm$ 5.62 | 10.38 $\pm$ 4.33 | 9.63 $\pm$ 5.17  | 9.81 $\pm$ 7.05 |
| Taxol            | 17.26 $\pm$ 4.61 | 13.11 $\pm$ 4.1   | 12.91 $\pm$ 3.99 | 11.65 $\pm$ 4.17 | 11.03 $\pm$ 4.51 | 10.81 $\pm$ 3.73 | 9.64 $\pm$ 3.17  | 8.40 $\pm$ 3.13 |
| Vinorelbine      | 20.30 $\pm$ 5.90 | 15.90 $\pm$ 7.52  | 13.73 $\pm$ 5.97 | 11.18 $\pm$ 5.52 | 11.12 $\pm$ 5.48 | 11.08 $\pm$ 4.68 | 9.843 $\pm$ 4.26 | 9.29 $\pm$ 5.31 |
| <b>PC-3</b>      |                  |                   |                  |                  |                  |                  |                  |                 |
| Nocodazole       | 20.52 $\pm$ 6.14 | 12.90 $\pm$ 5.51  | 11.51 $\pm$ 3.87 | 11.19 $\pm$ 4.66 | 11.75 $\pm$ 4.03 | 10.55 $\pm$ 4.69 | 9.51 $\pm$ 4.39  | 8.17 $\pm$ 4.48 |
| Taxol            | 19.80 $\pm$ 6.74 | 13.21 $\pm$ 5.61  | 13.27 $\pm$ 6.16 | 10.41 $\pm$ 3.62 | 11.36 $\pm$ 4.43 | 10.91 $\pm$ 4.78 | 9.26 $\pm$ 4.29  | 6.79 $\pm$ 3.33 |
| Vinorelbine      | 19.86 $\pm$ 6.46 | 12.11 $\pm$ 4.47  | 12.28 $\pm$ 4.74 | 11.86 $\pm$ 4.72 | 12.49 $\pm$ 3.90 | 10.58 $\pm$ 4.75 | 9.86 $\pm$ 3.99  | 6.78 $\pm$ 3.53 |

**Supplementary Table 10.** Average durations of events (in hours) for A549, PC-3 and HaCaT cell lines after the treatment with 1  $\mu$ M Taxol (T) + 10  $\mu$ M A-1155463 (A) for A549 and PC-3 cells + 100  $\mu$ M Z-VAD-FMK (ZVAD).

|                        | Duration of mitotic arrest before MOMP | Duration of mitotic arrest after MOMP | Total duration of mitotic arrest | Duration of post-slippage interphase |
|------------------------|----------------------------------------|---------------------------------------|----------------------------------|--------------------------------------|
| <b>A549 (T+A+ZVAD)</b> | 11.17 $\pm$ 3.17                       | 8.27 $\pm$ 3.55                       | 19.37 $\pm$ 4.2                  | 21.08 $\pm$ 5.63                     |
| <b>PC-3 (T+A+ZVAD)</b> | 8.86 $\pm$ 4.42                        | 7.54 $\pm$ 3.38                       | 16.06 $\pm$ 3.84                 | 18.67 $\pm$ 9.26                     |
| <b>HaCaT (T+ZVAD)</b>  | 7.27 $\pm$ 3.9                         | 6.55 $\pm$ 3.86                       | 13.51 $\pm$ 4.18                 | 24.13 $\pm$ 6.96                     |

**Supplementary Table 11.** Average durations of mitotic arrest (in hours) for HeLa and HaCaT cells after treatment with Barasertib, Taxol + Barasertib simultaneously, Taxol followed by Barasertib (sequentially) and Taxol only.

|              | Barasertib      | Taxol + Barasertib together | Taxol + Barasertib sequentially | Taxol            |
|--------------|-----------------|-----------------------------|---------------------------------|------------------|
| <b>HeLa</b>  | 1.15 $\pm$ 0.31 | 6.57 $\pm$ 3.1              | 8.73 $\pm$ 4.28                 | 12.71 $\pm$ 6.04 |
| <b>HaCaT</b> | 0.93 $\pm$ 0.32 | 6.29 $\pm$ 4.45             | 8.29 $\pm$ 3.35                 | 11.31 $\pm$ 5.12 |

**Supplementary Table 12.** Average durations of mitotic arrest (in hours) for sensitized A549 and PC-3 cells after treatment with Barasertib + A-1155463 (B+A), Taxol + A-1155463 + Barasertib together (T+A+B tog.), Taxol+ A-1155463 + Barasertib sequentially (T+A+B seq.) and Taxol + A-1155463 (T+A).

|             | B+A             | T+A+B tog.      | T+A+B seq.     | T+A              |
|-------------|-----------------|-----------------|----------------|------------------|
| <b>A549</b> | 1.13 $\pm$ 0.65 | 3.55 $\pm$ 3.23 | 6.83 $\pm$ 3.3 | 10.77 $\pm$ 4.29 |
| <b>PC-3</b> | 1.38 $\pm$ 0.42 | 3.44 $\pm$ 1.37 | 6.94 $\pm$ 3.4 | 10.22 $\pm$ 3.87 |

**Supplementary Table 13.** Fates of A549 cells after sequential treatment with mitotic inhibitors (1  $\mu$ M of Nocodazole, Taxol, or Vinorelbine) followed by 1  $\mu$ M of A-1155463 (number of cells survived/died)

|                    | Nothing added | Added after 4 h | Added after 20 h |
|--------------------|---------------|-----------------|------------------|
| <b>Nocodazole</b>  | 114/1         | 63/77           | 78/0             |
| <b>Taxol</b>       | 77/6          | 16/131          | 20/47            |
| <b>Vinorelbine</b> | 57/1          | 20/113          | 49/18            |
